# Supplementary material
Source: PubMed Central journal article supplement (PMC4491046)

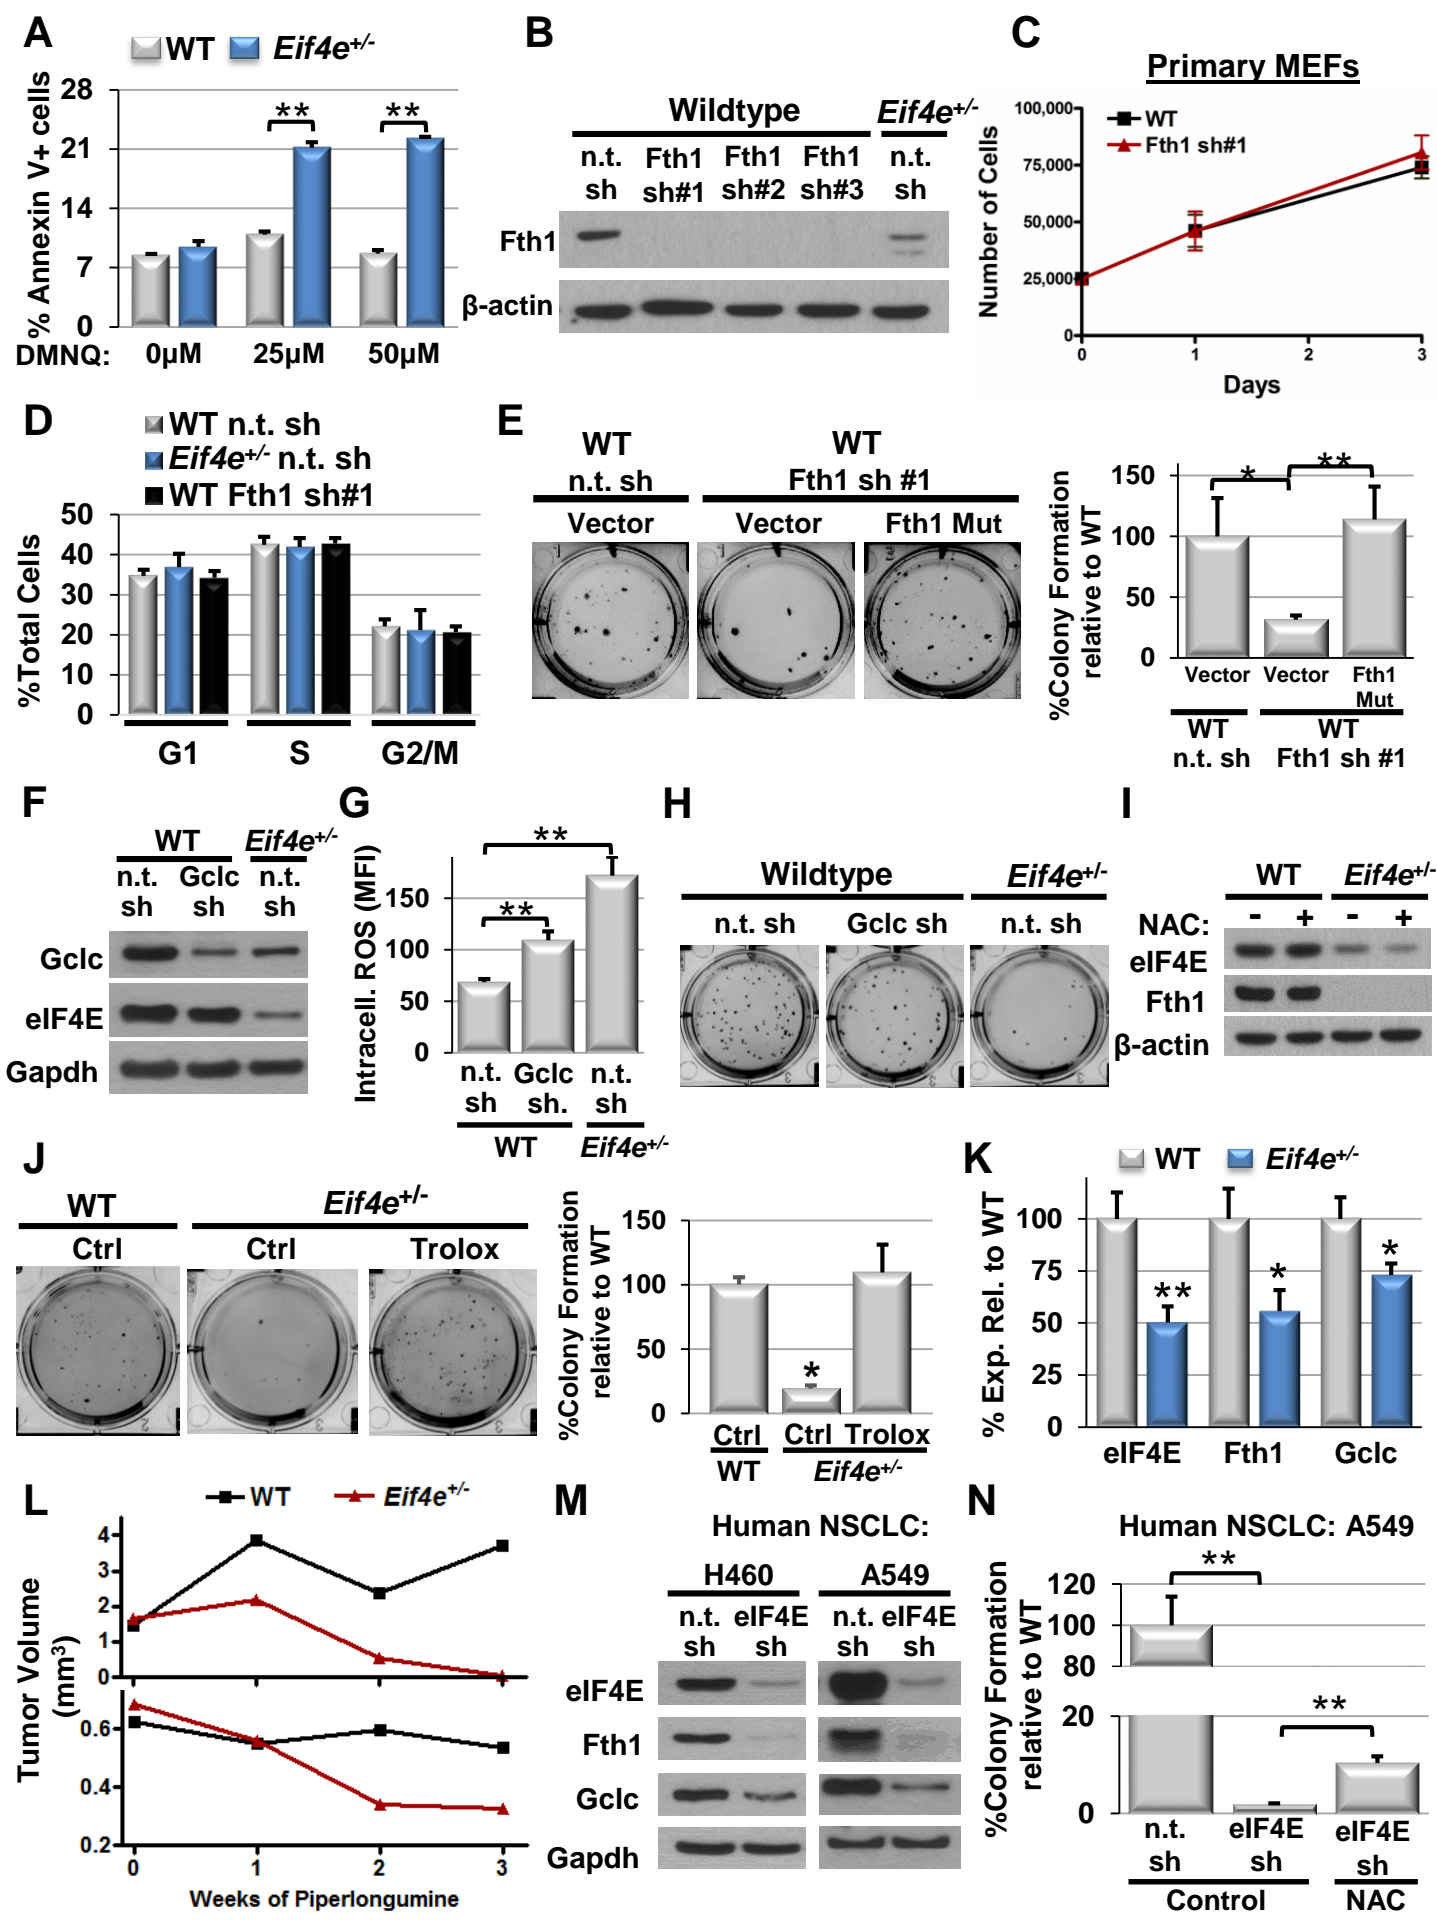

Supplement: NIHMS694805-supplement-7.pdf [file NIHMS694805-supplement-7.pdf]
